# Supplementary material for: Root zone in the Earth system
Source: Copernicus journal article supplement (doi:10.5194/egusphere-2024-332), 2024-02-20
Supplement: Supplementary file [file egusphere-2024-332-AC5-supplement.pdf]

While this review paper demonstrates promise and importance, it predominantly focuses on listing previous research findings, with each section serving as a basic introduction, lacking deeper analysis and synthesis. Here are some suggestions for improvement:

We thank Anonymous Referee #3's endorsement on the "promise and importance" of our review paper. In the revised version, we will deepen our analysis, and make a balance between reviewing and providing a new perspective.

In line 77, it is recommended to revise "Plants" to "Plant roots."

Will modify.

Section 2 should be reorganized to enhance coherence.

We will reorganize Section 2.

Section 3.2.2 would benefit from additional content to provide greater depth.

We will improve Section 3.2.2.

Figure 6 should have the first letter of "Capillary" capitalized.

Will modify.

Consider removing Section 4.3.3 from the manuscript, as it may not be directly relevant to the main topic.

We will reorganize the entire Section 4.3 in the revision.

Figures 1, 3, and 4 are cited from published papers, which may be excessive for this manuscript. Please consider creating some original figures for inclusion.

We will make some original figures.
